# Supplementary material
Source: Springer Nature journal article supplement (https://www.springermedizin.de/resource/supplementary/13054_2013_3041_MOESM1_ESM.pdf/9712458)

# MAP

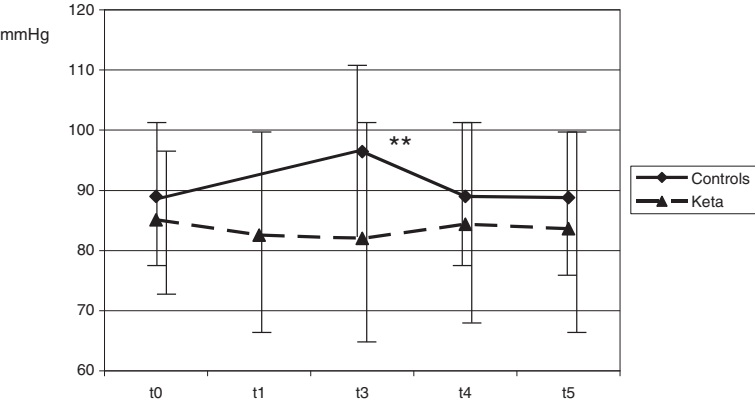

Supplement: MOESM1 [file 9712458]
